# Supplementary material for: Electrochemical Characterization of Electrodeposited Copper in Amine CO2 Capture Media
Source: MDPI journal article supplement (doi:10.3390/ma17081825), 2024-04-16
Supplement: s1 [file s1]

# Electrochemical Characterization of Electrodeposited Copper in Amine CO<sub>2</sub> Capture Media

Corentin Penot <sup>1</sup>, Kranthi Kumar Maniam <sup>1</sup> and Shiladitya Paul <sup>1,2,\*</sup>

<sup>1</sup> Materials Innovation Centre, School of Engineering, University of Leicester, Leicester LE1 7RH, UK; cp473@leicester.ac.uk (C.P.); km508@leicester.ac.uk (K.K.M.)

<sup>2</sup> Materials Performance and Integrity Technology Group, TWI, Cambridge CB21 6AL, UK

\* Correspondence: shiladitya.paul@twi.co.uk

## 1. Electroplating of Copper

### 1.1. Materials

Copper sulfate pentahydrate (CuSO<sub>4</sub>·5H<sub>2</sub>O), sulfuric acid (H<sub>2</sub>SO<sub>4</sub>, 98% purity), and hydrochloric acid (HCl, 37% purity) were procured from Fischer Scientific (United Kingdom). Copper panels were acquired from Schloetter (United Kingdom).

### 1.2. Experimental Setup

#### 1.2.1. Experimental Preparation

Initially, copper substrates were cut into 2.5 × 2.5 cm<sup>2</sup> sized specimens and polished using 600 and 1200 grade emery paper. Subsequently, they were rinsed in deionized water and activated in a 10 wt % HCl solution. Afterward, the samples were rinsed again with deionized water (DI) and utilized as the cathode for the copper deposition process. A copper plate measuring 5 × 10 cm<sup>2</sup> was employed as the anode.

#### 1.2.2. Electroplating Solution

The electroplating solution was formulated by mixing 150 g.L<sup>-1</sup> of CuSO<sub>4</sub>·5H<sub>2</sub>O, 40 mL.L<sup>-1</sup> of H<sub>2</sub>SO<sub>4</sub>, and deionized water. Initially, DI water was warmed up to 45–50 deg C followed by the slow addition of 150 g.L<sup>-1</sup> of CuSO<sub>4</sub>·5H<sub>2</sub>O. Once the solution is well mixed, 40 mL.L<sup>-1</sup> of H<sub>2</sub>SO<sub>4</sub> is added to the solution drop by drop until a homogeneous mixture is obtained. The resultant solution was cooled to laboratory temperature and employed as the electroplating solution.

#### 1.2.3. Electroplating Experiment

The electroplating experiment was conducted by applying a voltage of 0.63 V using a DC rectifier (10 A, 12 V, British Electricals Limited, United Kingdom) for a duration of 35 minutes. The distance between the anode and the cathode was maintained at 95 mm (as illustrated in Figure S1), and air agitation was employed to ensure the uniform distribution of concentrations near the cathode.

**Citation:** Penot, C.; Maniam, K.K.; Paul, S. Electrochemical Characterization of Electrodeposited Copper in Amine CO<sub>2</sub> Capture Media. *Materials* **2024**, *17*, 1825. <https://doi.org/10.3390/ma17081825>

Academic Editors: Georgi Kostadinov, Todor Penyashki and Mara Kandeve

Received: 26 February 2024

Revised: 5 April 2024

Accepted: 8 April 2024

Published: 16 April 2024

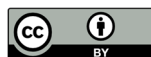

**Copyright:** © 2024 by the authors. Licensee MDPI, Basel, Switzerland. This article is an open access article distributed under the terms and conditions of the Creative Commons Attribution (CC BY) license (<https://creativecommons.org/licenses/by/4.0/>).

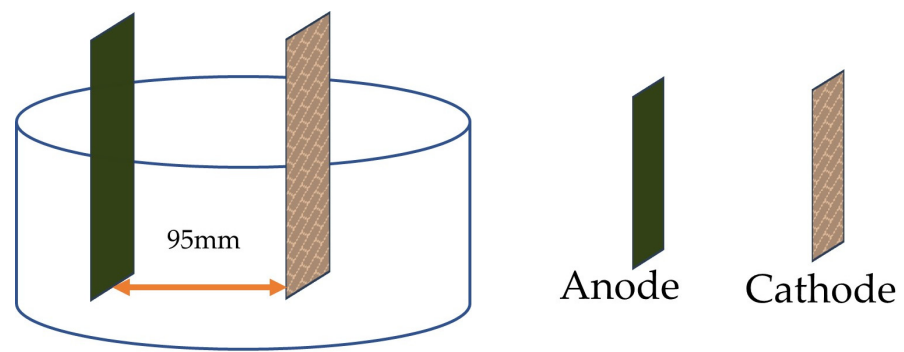

**Figure S1.** Schematic representing the electroplating setup, highlighting the positioning of the anode and cathode, maintained at a consistent distance of 95 mm.

## 2. Electrochemical Testing

To perform Tafel extrapolations, linear regression was performed on the anodic branch of the polarization plot ( $\log(j)$  vs. potential). The corrosion current density ( $j_{\text{corr}}$ ) was taken as the intersect between the linear regression and lowest current density recorded (at corrosion potential). All fits are presented below.

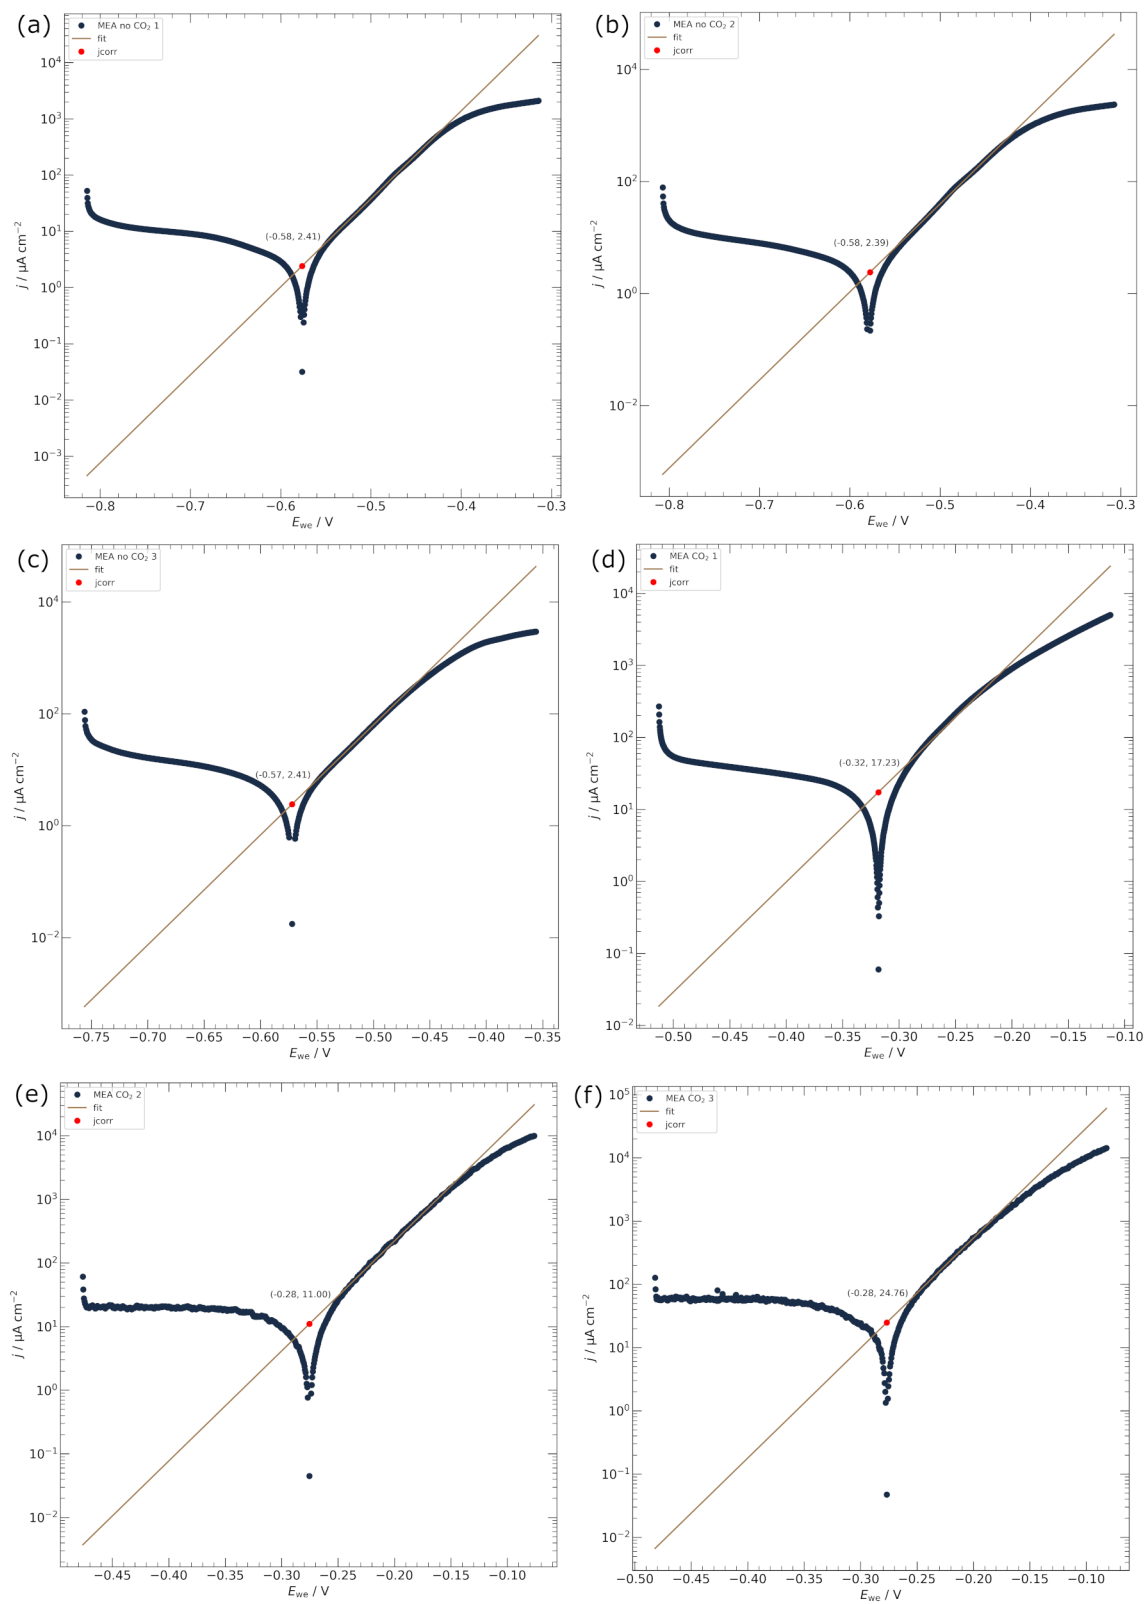

**Figure S2.** (a–f) Tafel extrapolation of potentiodynamic polarization of copper specimens in MEA. Scan rate  $10 \text{ mV min}^{-1}$ .

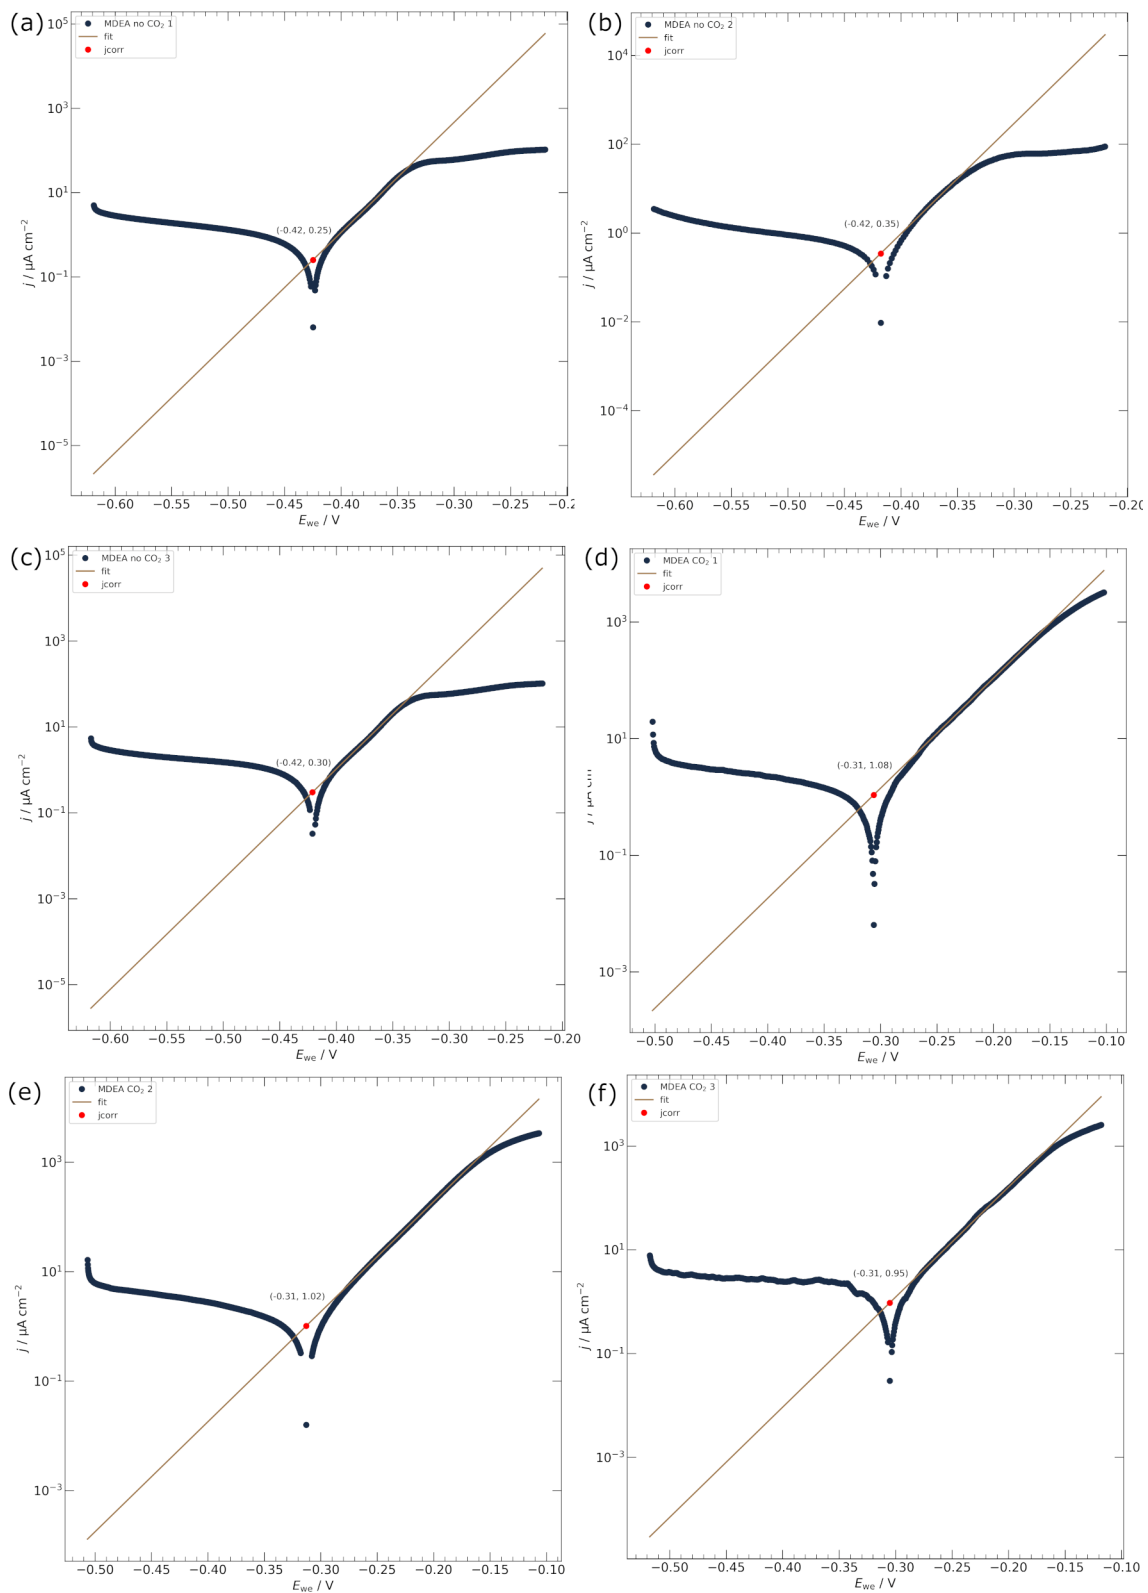

**Figure S3.** (a–f) Tafel extrapolation of potentiodynamic polarization of copper specimens in MDEA. Scan rate  $10 \text{ mV min}^{-1}$ .

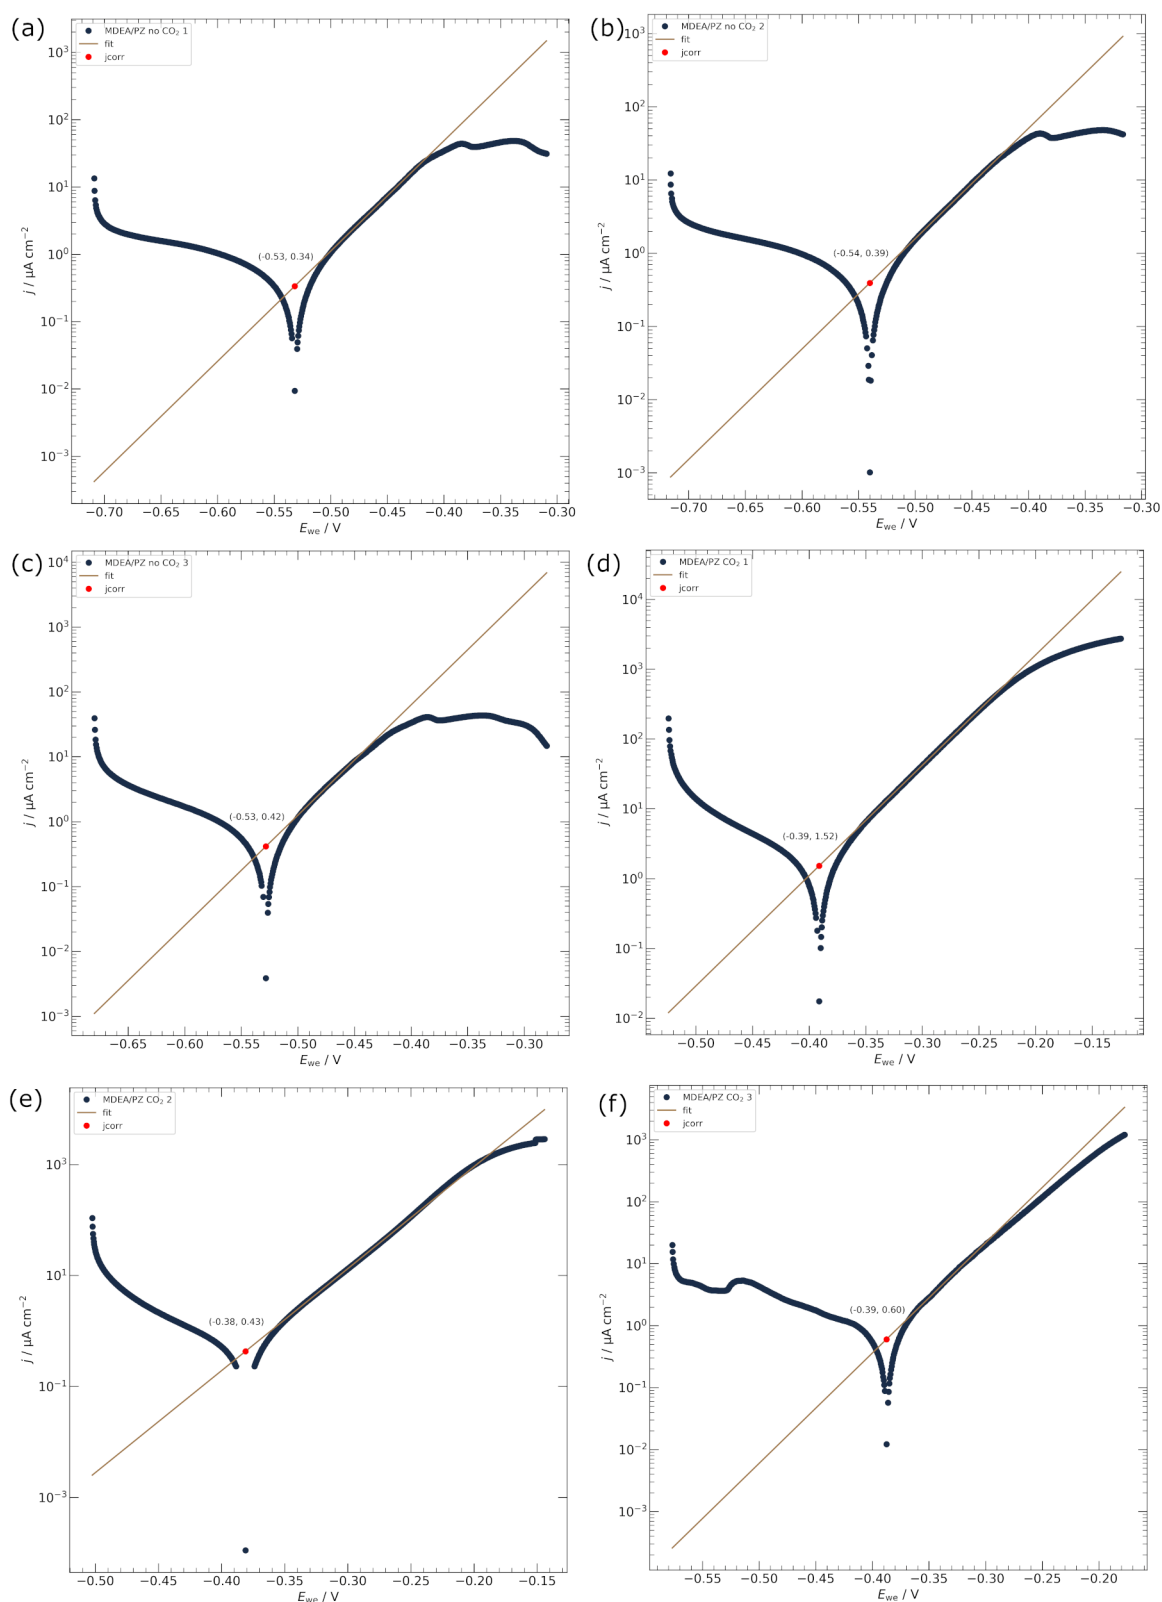

**Figure S4.** (a–f) Tafel extrapolation of potentiodynamic polarization of copper specimens in MDEA-PZ. Scan rate 10 mV min<sup>-1</sup>.

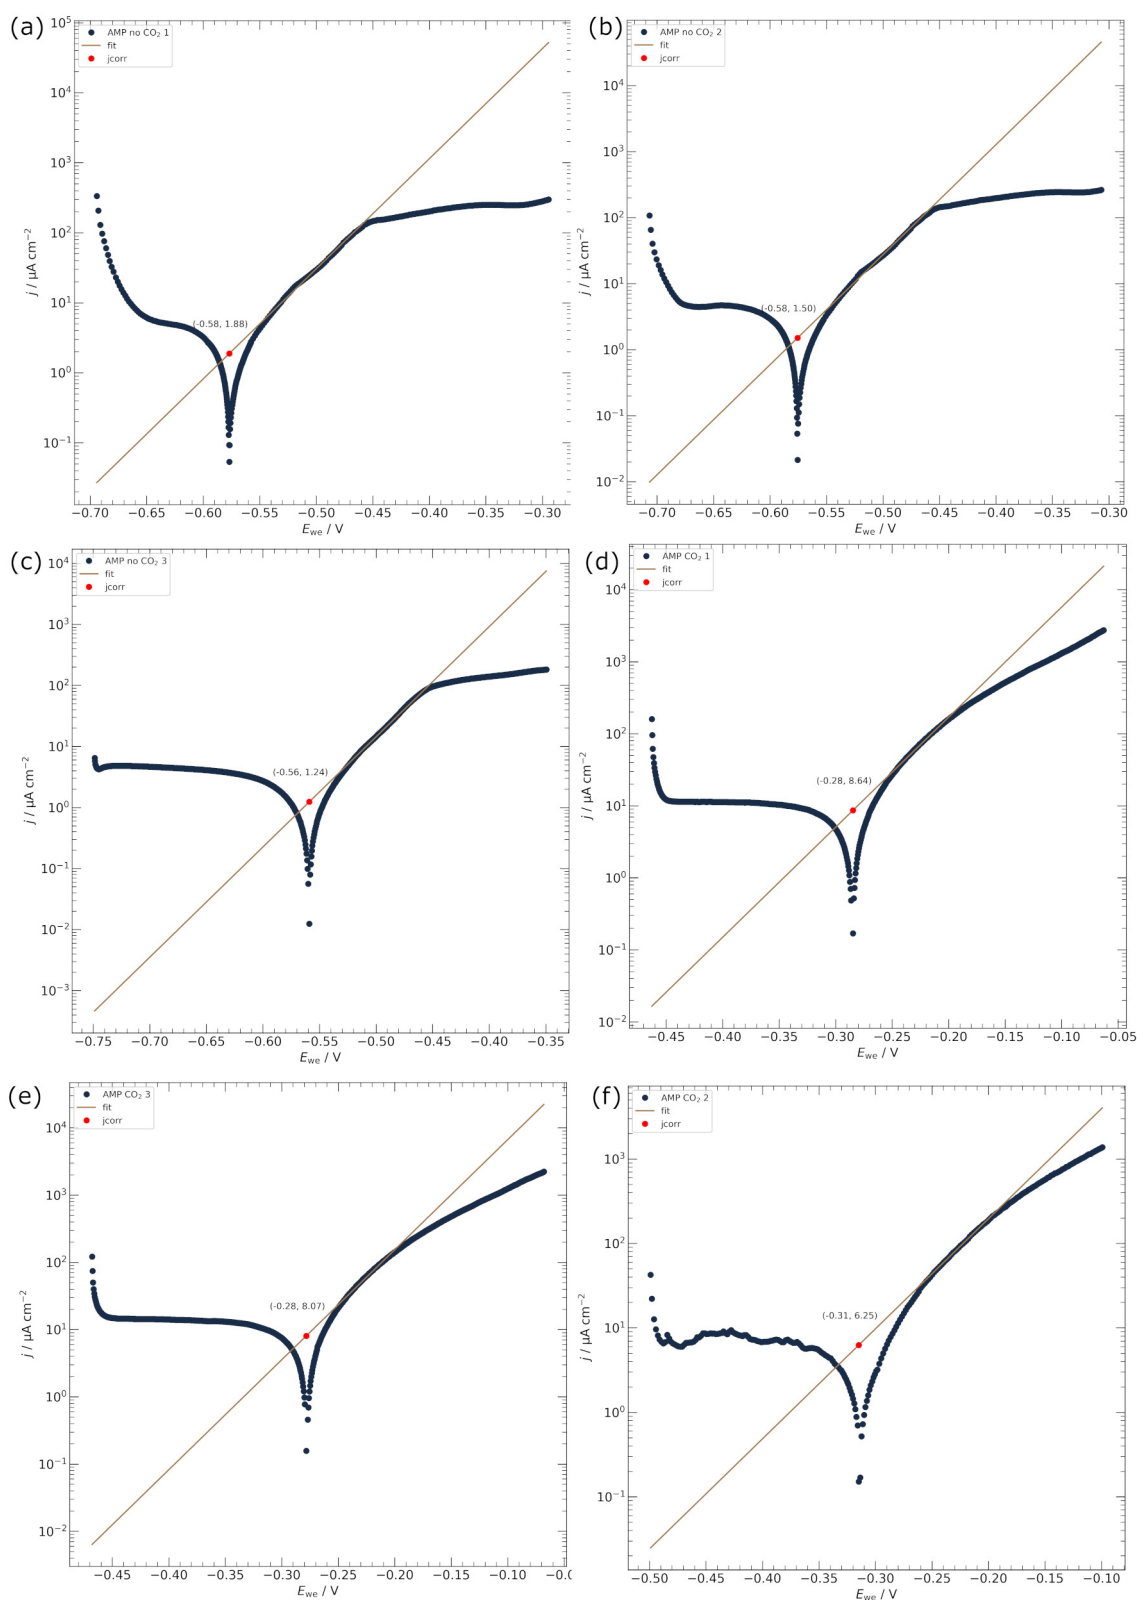

**Figure S5.** (a–f) Tafel extrapolation of potentiodynamic polarization of copper specimens in AMP. Scan rate  $10 \text{ mV min}^{-1}$ .

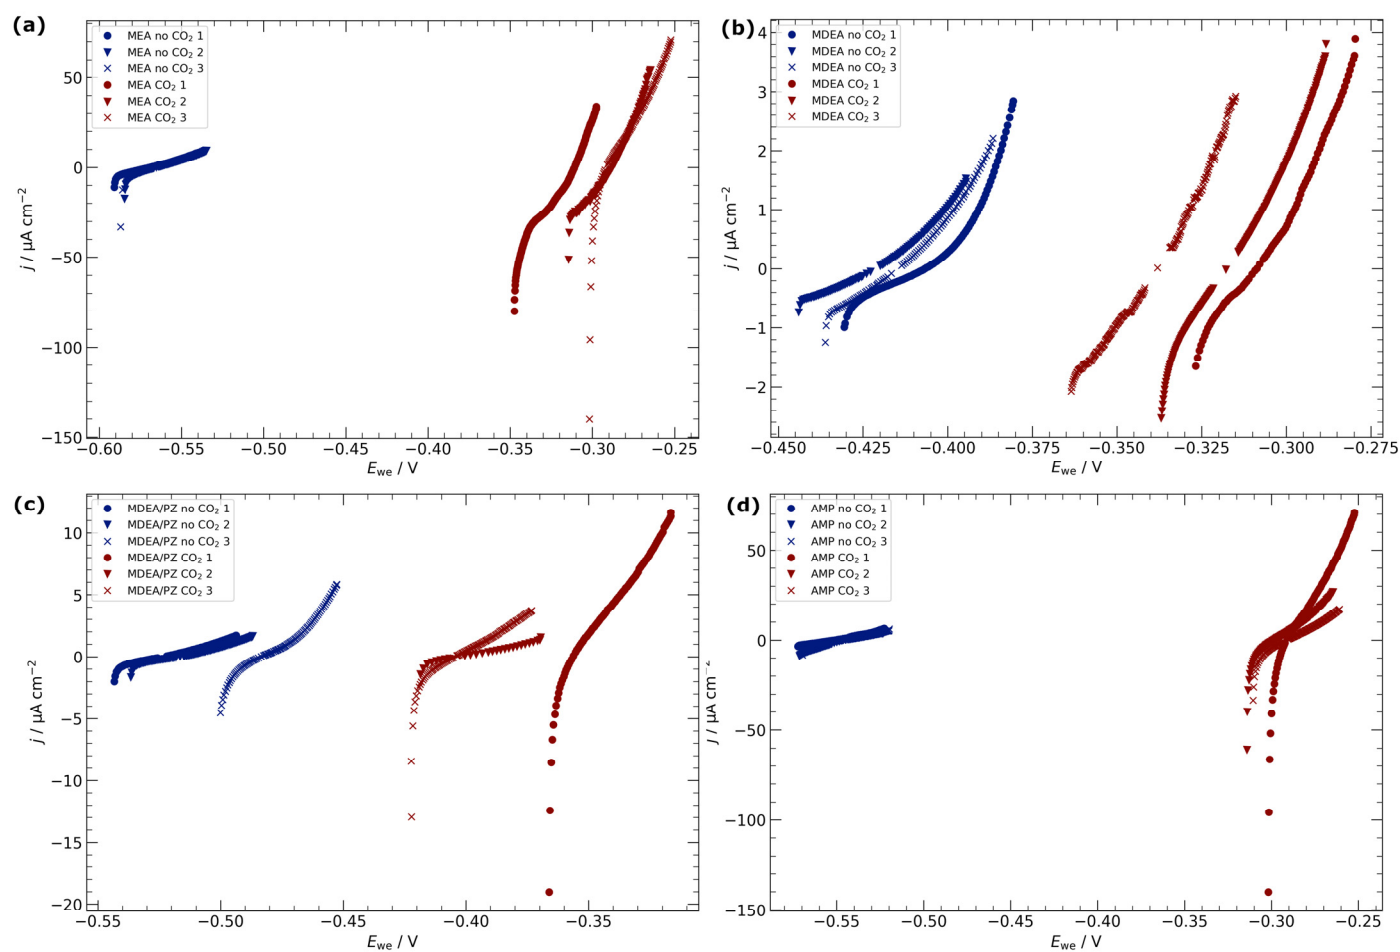

**Figure S6.** Linear polarization resistance of copper specimens in the different amine-based capture media. (a) MEA, (b) MDEA, (c) MDEA/PZ, (d) AMP. Scan rate  $0.125 \text{ mV s}^{-1}$ .

**Table S1.** Average cell resistances in the different amine solutions.

| Media   | CO <sub>2</sub> | R <sub>cell</sub> / Ω |
|---------|-----------------|-----------------------|
| MEA     | no              | $7.8 \pm 0.6$         |
|         | yes             | $2.0 \pm 0.2$         |
| MDEA    | no              | $17.4 \pm 2.7$        |
|         | yes             | $8.3 \pm 0.7$         |
| MDEA/PZ | no              | $18.7 \pm 9.0$        |
|         | yes             | $12.6 \pm 2.4$        |
| AMP     | no              | $7.5 \pm 1.2$         |
|         | yes             | $4.4 \pm 0.2$         |
| KCl     | no              | $2.4 \pm 2.1$         |
